# Supplementary material for: A systematic review of the measurement properties of the Body Image Scale (BIS) in cancer patients
Source: Springer Nature journal article supplement (doi:10.1007/s00520-018-4145-x), 2018-03-12
Supplement: MOESM1 [file 15527170]

## A systematic review of the measurement properties of the Body Image Scale (BIS) in cancer patients

Heleen C. Melissant, Koen I. Neijenhuijs, Femke Jansen, Neil K. Aaronson, Mogens Groenvold, Bernhard Holzner, Caroline B. Terwee, Cornelia F. van Uden-Kraan, Pim Cuijpers, Irma M. Verdonck-de Leeuw

Corresponding author:

Irma M. Verdonck-de Leeuw

Department of Otolaryngology-Head and Neck Surgery

VU University Medical Center

E-mail: [im.verdonck@vumc.nl](mailto:im.verdonck@vumc.nl).

Supportive Care in Cancer

### Appendix A. Search terms (Pubmed)

('Perceived Stress Scale'/de OR 'Insomnia Severity Index'/de OR 'International Index of Erectile Function'/de OR ( (cancer NEAR/3 worry\* NEAR/3 scale\*) OR (patient NEAR/3 specifieke NEAR/3 klacht\*) OR (insomni\* NEAR/3 sever\* NEAR/3 index\*) OR (6-item NEAR/6 female NEAR/3 sexual\* NEAR/3 function\*) OR (5-item NEAR/6 erectile NEAR/3 function\*) OR (sexual\* NEAR/3 health NEAR/3 inventor\* NEAR/3 men) OR (body NEAR/3 image NEAR/3 scal\*) OR ((EORTC OR 'European Organization for Research and Treatment of Cancer') NEAR/6 (QLQ OR 'Quality of Life') NEAR/6 (PATSAT32 OR BR23 OR BR-23 OR CR-29 OR CR29 OR H&N25 OR HN25 OR HN-25)) OR (Caron NEAR/3 screening NEAR/3 questionnaire\*) OR (Jong NEAR/3 Gierveld NEAR/3 loneliness) OR (7-item NEAR/3 dyadis NEAR/3 adjustment\*) OR (vragenlijst NEAR/3 gezinskenmerken ) OR (job NEAR/3 content\* NEAR/3 questionnaire\*) OR (vragenlijst NEAR/3 beleving NEAR/3 beoordeling NEAR/3 arbeid) OR (Alcohol NEAR/3 five-shot) OR (perceived NEAR/3 stress NEAR/3 scale\*) OR (functional NEAR/3 assessment NEAR/3 cancer NEAR/3 therap\* NEAR/3 endocrine ) OR (breast NEAR/3 impact NEAR/3 treatment NEAR/3 scale\*) OR (breast NEAR/3 reconstruction NEAR/3 satisfaction NEAR/3 questionnair\*) OR (breast NEAR/3 cancer NEAR/3 patients NEAR/3 needs NEAR/3 questionnaire\*) OR (stoma NEAR/3 quality NEAR/3 life NEAR/3 questionnaire\*) OR (shoulder\* NEAR/3 disabilit\* NEAR/3 questionnaire\*) OR (('CWS' OR 'SPK' OR 'FSFI-6' OR 'IIEF-5' OR 'CARON' OR 'JGLS' OR 'DAS-7' OR 'VGK-SF' OR 'JCQ' OR 'VBBA' OR 'A5S' OR 'FACT-ES' OR 'BITS' OR 'BRECON-31' OR 'BR-CNPQ' OR 'SDQ' OR 'stoma-QoL' ) NEAR/3 (assess\* OR score\* OR scale\* OR questionnaire\* OR inventor\* OR measure\*)):ab,ti) AND (neoplasm/exp OR (neoplas\* OR cancer\* OR oncolog\* OR tumor\* OR tumour OR carcino\*):ab,ti) AND ('validation study'/de OR 'reproducibility'/de OR 'psychometry'/de OR 'observer variation'/de OR 'discriminant analysis'/de OR 'correlation coefficient'/de OR reliability/de OR 'sensitivity and specificity'/de OR validity/exp OR 'sensitivity analysis'/de OR 'internal consistency'/de OR 'confidence interval'/de OR (psychometr\* OR reproducib\* OR clinimetr\* OR clinometr\* OR observer-varia\* OR reliab\* OR valid\* OR coefficient OR interna\*-consisten\* OR (cronbach\* NEAR/3 (alpha OR alphas )) OR (item\* NEXT/1 (correlation\* OR selection\* OR reduction\*)) OR agreement OR precision OR imprecision OR precise-value\* OR test\*-retest\* OR (test NEAR/3 retest ) OR (reliab\* NEAR/3 (test OR retest )) OR stability OR interrater OR inter-rater OR intrarater OR intra-rater OR intertester OR inter-tester OR intratester OR intratester OR interobserver OR inter-observer OR intraobserver OR intra-observer OR intertechnician OR inter-technician OR intratechnician OR intra-technician OR interexaminer OR inter-examiner OR intraexaminer OR intra-examiner OR interassay OR inter-assay OR intraassay OR intra-assay OR interindividual OR inter-individual OR intraindividual OR intra-individual OR interparticipant OR inter-participant OR intraparticipant OR intra-participant OR kappa OR kappa-s OR kappas

OR (coefficient\* NEAR/3 variation\*) OR repeatab\* OR ((replicab\* OR repeat\*) NEAR/3 (measure OR measures OR findings OR result OR results OR test OR tests)) OR generaliza\* OR generalisa\* OR concordance OR (intraclass NEAR/3 correlation\* ) OR discriminative OR 'known group' OR (factor\* NEAR/3 (analys\* OR structure\*)) OR dimensionality OR subscale\* OR (multitrait NEAR/3 scaling) OR item-discriminant\* OR (interscale NEAR/3 correlat\*) OR ((error OR errors ) NEAR/3 (measure\* OR correlat\* OR evaluat\* OR accuracy OR accurate OR precision OR mean )) OR ((individual OR interval OR rate OR analy\*) NEAR/3 variabilit\*) OR (uncertain\* NEAR/3 (measure\*)) OR (error NEAR/3 measure\*) OR sensitiv\* OR responsive\* OR (limit NEAR/3 detection ) OR (minimal\* NEAR/3 detectab\*) OR interpretab\* OR (small\* NEAR/3 (real OR detectable ) NEAR/3 (change OR difference )) OR (meaningful\* NEAR/3 change\*) OR (minimal\* NEAR/3 (important OR detectab\* OR real) NEAR/3 (change\* OR difference)) OR ((ceiling OR floor) NEXT/1 effect\*) OR 'Item response model' OR IRT OR Rasch OR 'Differential item functioning' OR DIF OR 'computer adaptive testing' OR 'item bank' OR 'cross-cultural equivalence' OR (confidence\* NEAR/3 interval\*):ab,ti)
